# Supplementary material
Source: publisher figshare collection journal article supplement (https://karger.figshare.com/ndownloader/files/21997005)
Supplement: Supplementary file 1 [file 21997005]

Supplementary Table 2. Insurance coverage and financial support in New Zealand IBD patients, n=123

|  | n (%) |
| --- | --- |
| *Type of medical insurance coverage*  Private  Public  Unknown | 51 (42)  69 (56)  3 |
| *Difficulty to arrange life insurance*  Not tried  I had it before I was diagnosed  Not difficult  Somewhat difficult  Very difficult  Unknown | 56 (46)  28 (23)  12 (10)  14 (11)  9 (7)  4 |
| *Difficulty to arrange income protection insurance*  Not tried  I had it before I was diagnosed  Not difficult  Somewhat difficult  Very difficult  Unknown | 84 (68)  10 (8)  4 (3)  9 (7)  12 (10)  4 |
| *Most PAID sick days in a 12 month period (median)a* | 5 |
| *Most UNPAID sick days in a 12 month period (median)a* | 0 |
| *Have you claimed income protection insurance or government benefit (WINZ)?a,b*  Income protection insurance  WINZ  Neither  Unknown | 2 (2)  17 (14)  103 (84)  1 |
| *When claimed, did you receive government benefit (WINZ)?*  No  Yes | 9 (53)  8 (47) |

aDuring the time that patients were working and symptoms were causing most difficulties

bWINZ: Work and Income New Zealand (government benefit)
